# Supplementary material for: Reactive Adsorption Performance and Behavior of Gaseous Cumene on MCM-41 Supported Sulfuric Acid
Source: MDPI journal article supplement (doi:10.3390/molecules27165129), 2022-08-11
Supplement: s1 [file s1]

# Reactive Adsorption Performance and Behavior of Gaseous Cumene on MCM-41 Supported Sulfuric Acid

Dandan Zhao <sup>1</sup>, Yuheng Liu <sup>2,\*</sup>, Xiaolong Ma <sup>3</sup>, Jinjin Qian <sup>1</sup>, Zichuan Ma <sup>2,\*</sup>

<sup>1</sup> Hebei Key Laboratory of Inorganic Nano-Materials, College of Chemistry and Material Sciences, Hebei Normal University, Shijiazhuang, 050024, China

<sup>2</sup> Hebei Key Laboratory of Innovative Drug Research and Evaluation, College of Pharmaceutical Sciences, Hebei Medical University, Shijiazhuang 050017, China

<sup>3</sup> School of Environmental Science and Engineering, Hebei University of Science and Technology, Shijiazhuang 050018, China

\* Correspondence: 18100757@hebmu.edu.cn (Y.L.); mazc@hebtu.edu.cn (Z.M.);  
Tel.: +86 0311 80787400 (Z.M.)

## Contents

|                                                                                                  |   |
|--------------------------------------------------------------------------------------------------|---|
| Figure S1. FTIR spectrum of the adsorbed product I .....                                         | 2 |
| Figure S2. FTIR spectrum of the adsorbed product II .....                                        | 2 |
| Figure S3. <sup>1</sup> H NMR spectrum of the adsorbed product I .....                           | 3 |
| Figure S4. <sup>13</sup> C NMR spectrum of the adsorbed product I .....                          | 3 |
| Figure S5. <sup>1</sup> H NMR spectrum of the adsorbed product II .....                          | 4 |
| Figure S6. <sup>13</sup> C NMR spectrum of the adsorbed product II .....                         | 4 |
| Figure S7. FTIR spectrum of the adsorbed product from the resulting mixture .....                | 5 |
| Figure S8. <sup>1</sup> H NMR spectrum of the adsorbed product from the resulting mixture .....  | 5 |
| Figure S9. <sup>13</sup> C NMR spectrum of the adsorbed product from the resulting mixture ..... | 6 |
| Table S1. Experimental and fitting results on adsorption performance .....                       | 6 |

**Note:** there were two adsorption products in the experiments. One was 4-isopropylbenzenesulfonic acid (I), another was 4,4'-sulfonylbis(isopropylbenzene) (II).

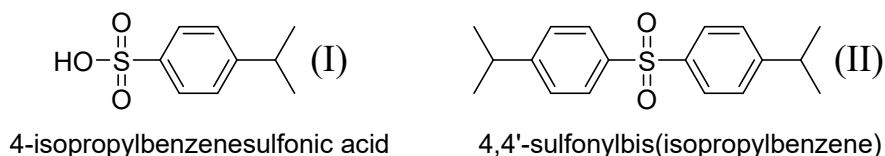

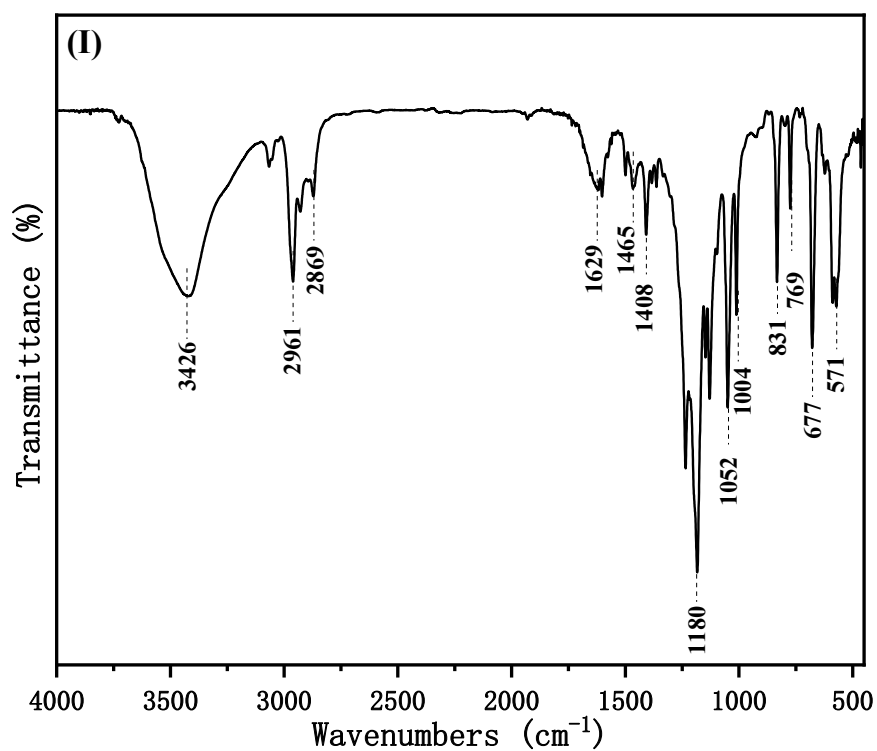

Figure S1. FTIR spectrum of the adsorbed product I

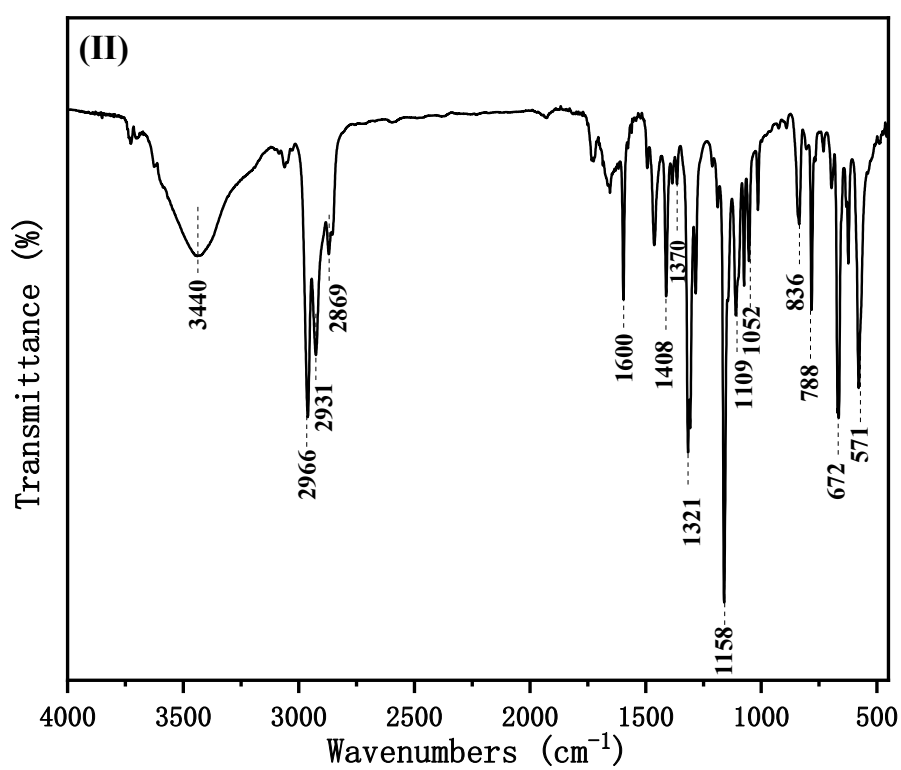

Figure S2. FTIR spectrum of the adsorbed product II

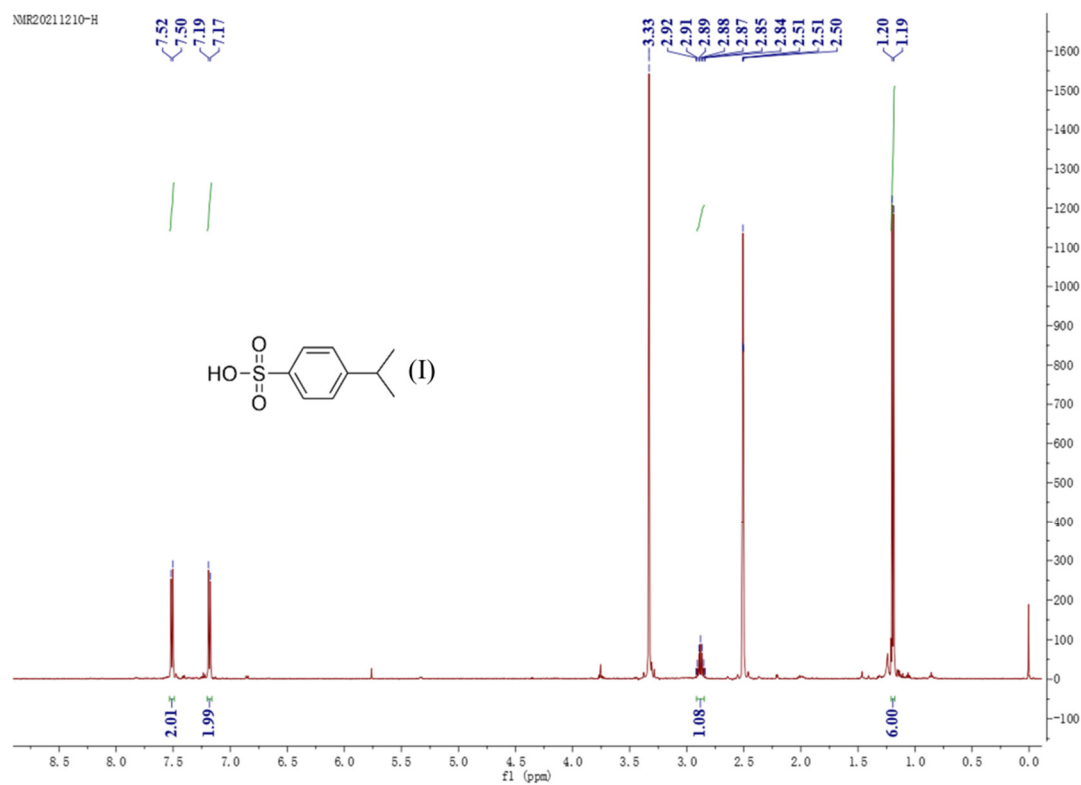

**Figure S3.** The  $^1\text{H}$  NMR spectrum of the adsorbed product I

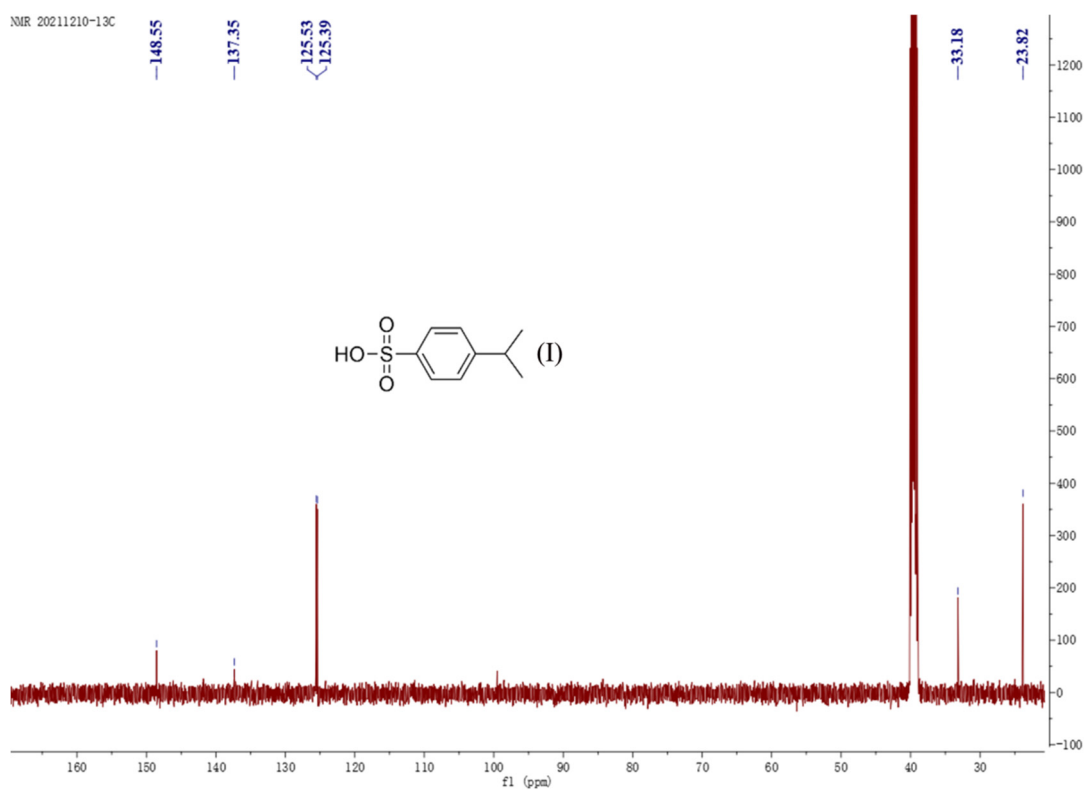

**Figure S4.**  $^{13}\text{C}$  NMR spectrum of the adsorbed product I

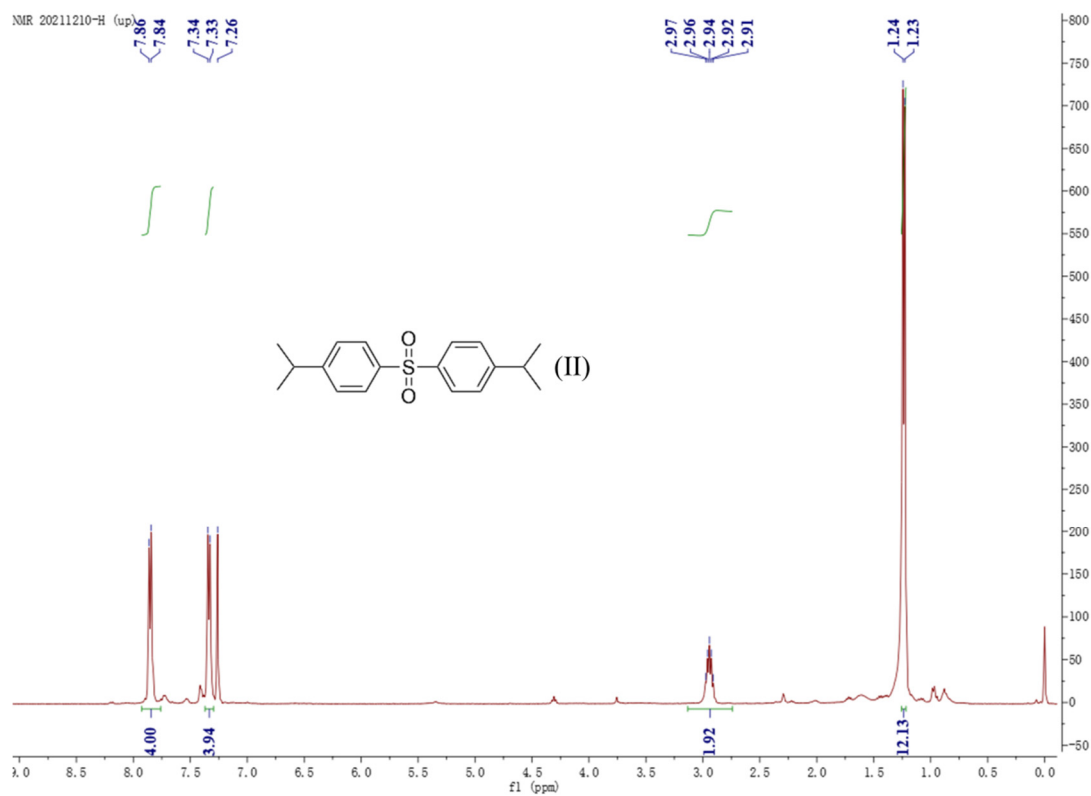

Figure S5.  $^1\text{H}$  NMR spectrum of the adsorbed product II

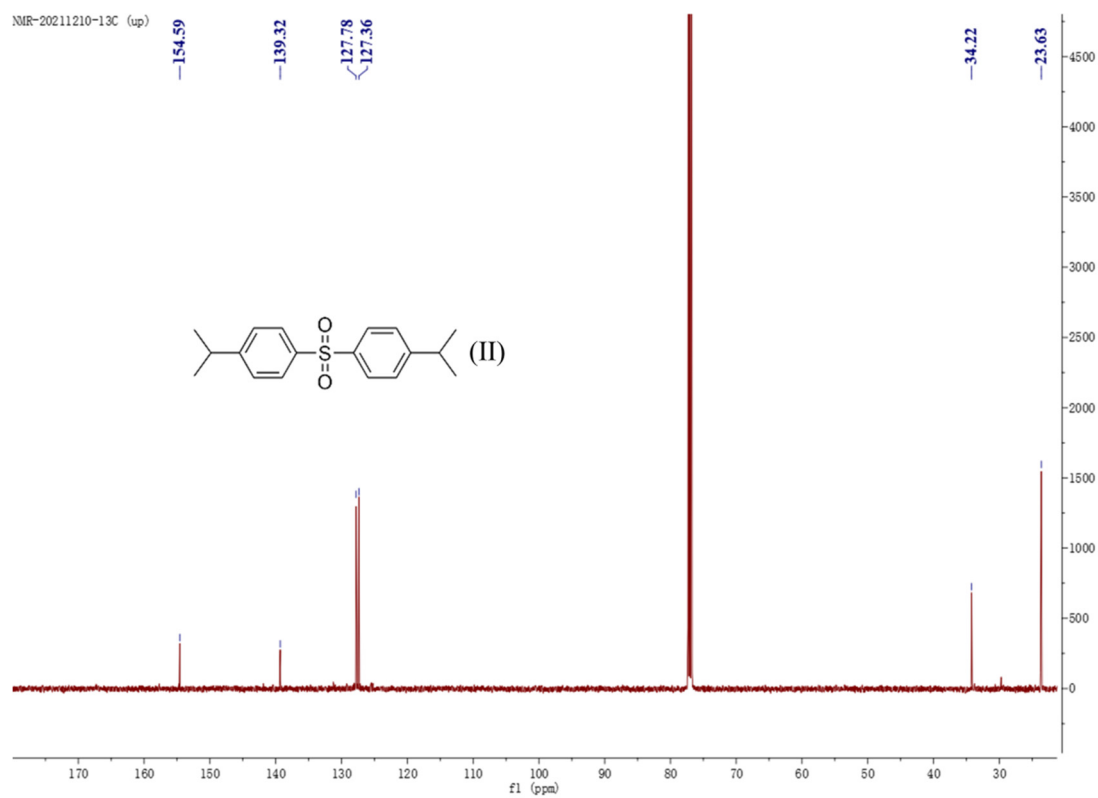

Figure S6.  $^{13}\text{C}$  NMR spectrum of the adsorbed product II

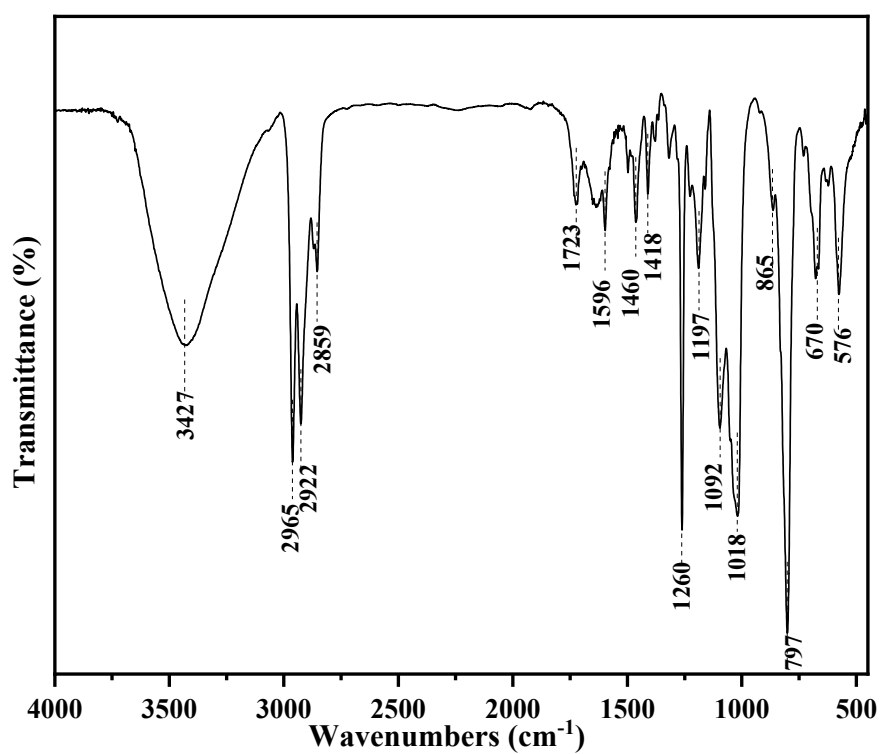

**Figure S7.** FTIR spectrum of the adsorbed product from the resulting mixture

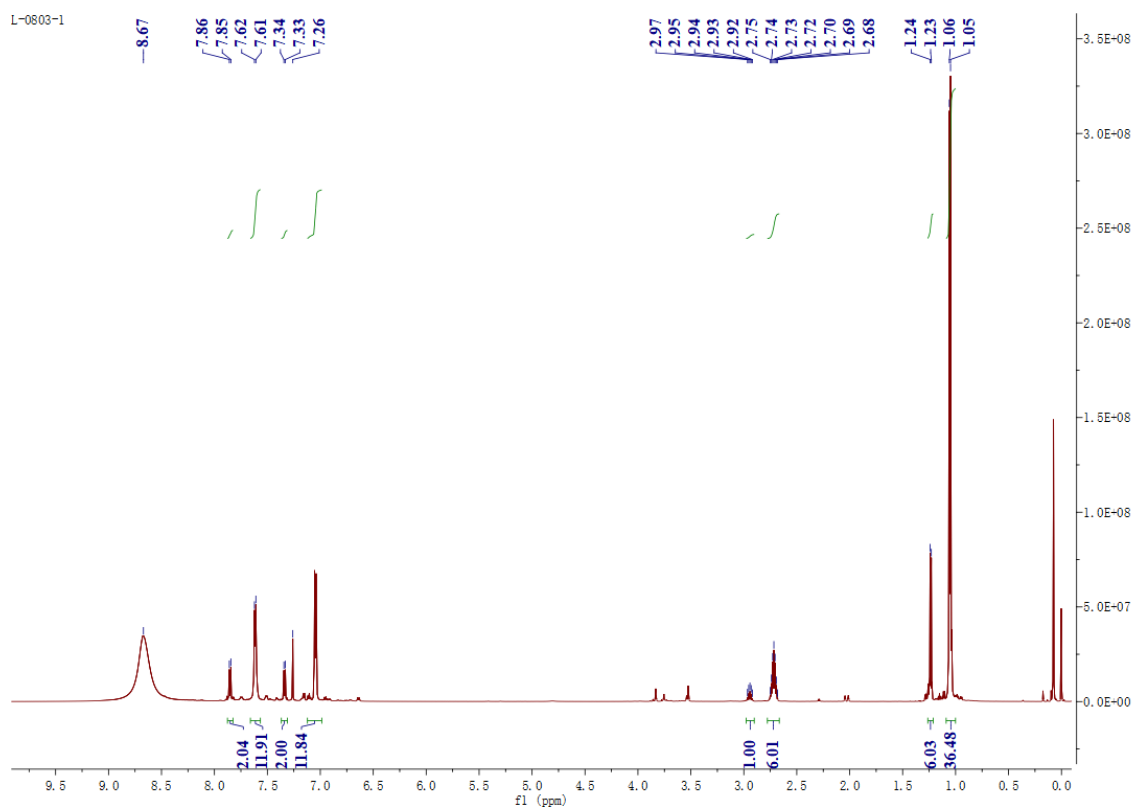

**Figure S8.**  $^1\text{H}$  NMR spectrum of the adsorbed product from the resulting mixture

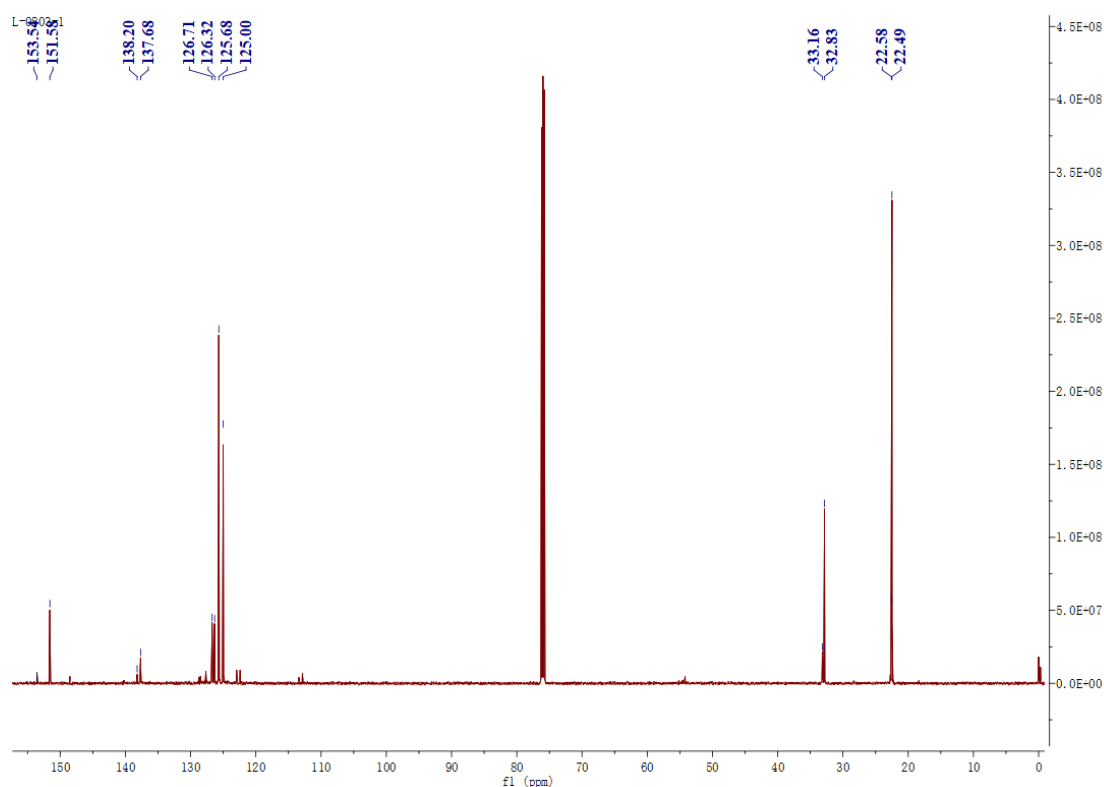

**Figure S9.**  $^{13}\text{C}$  NMR spectrum of the adsorbed product from the resulting mixture

#### Instruction:

Since there is one cumene residue structure in product I and two cumene residue structures in product II. Therefore, the following formula should be used to calculate the ratio of product I and product II.

$$\frac{N_I}{N_{II}} = \frac{H_I}{\frac{H_{II}}{2}} \dots\dots\dots (\text{S-1})$$

Where,  $N$  represents the amount of substance (mol) of products I and II, and  $H$  is the integral value of hydrogen atom in  $^1\text{H}$  NMR spectra of the mixture (**Figure S8**).

**Table S1.** Experimental and fitting results on adsorption performance

| Parameters and metrics     | Exp. No. |        |        |        |        |        |        |
|----------------------------|----------|--------|--------|--------|--------|--------|--------|
|                            | 1        | 2      | 3      | 4      | 5      | 6      | 7      |
| Experimental:              |          |        |        |        |        |        |        |
| $t_B$ (min)                | 6.34     | 24.68  | 56.69  | 26.04  | 16.67  | 69.81  | 10.68  |
| $Q_B$ (mg g $^{-1}$ )      | 114.44   | 222.41 | 259.29 | 135.11 | 228.51 | 316.73 | 145.17 |
| Dose-response model:       |          |        |        |        |        |        |        |
| $q_0$ (mg g $^{-1}$ )      | 0.324    | 0.361  | 0.374  | 0.264  | 0.494  | 0.432  | 0.299  |
| $a$                        | 3.569    | 5.902  | 8.792  | 4.695  | 5.048  | 9.843  | 4.033  |
| $R^2$                      | 0.996    | 0.999  | 0.998  | 0.995  | 0.999  | 0.999  | 0.999  |
| $t_{B,th}$ (min)           | 6.73     | 24.87  | 58.06  | 26.56  | 16.25  | 69.60  | 10.42  |
| $Q_{B,th}$ (mg g $^{-1}$ ) | 118.31   | 223.13 | 268.55 | 140.80 | 231.43 | 324.50 | 151.59 |
